# Supplementary material
Source: publisher site journal article supplement (https://www.dovepress.com/article/supplementary_file/540364/540634%20Revised%20Supplementary%20Tables.docx)
Supplement: Supplementary file 1 [file 540634%20Revised%20Supplementary%20Tables.docx]

| **Supplementary Table S1** The estimate for association between chronotype and serum metabolic parameters stratified by age | | | | | |
| --- | --- | --- | --- | --- | --- |
| Metabolic parameters | Ages 40-59 (n = 659) | |  | Ages ≥ 60 (n = 286) | |
| β(95% CI) | *P*-value |  | β (95% CI) | *P*-value |
| FBG | -0.02 (-0.08, 0.04) | 0.498 |  | 0.01 (-0.13, 0.13) | 0.990 |
| TG | -0.03 (-0.28, 0.22) | 0.814 |  | -0.39 (-0.87, 0.08) | 0.105 |
| TC | -0.08 (-0.17, 0.01) | 0.068 |  | -0.25 (-0.41, -0.09) | 0.002 |
| LDL-C | -0.19 (-0.34, -0.05) | 0.010 |  | -0.28 (-0.53, -0.03) | 0.028 |
| HDL-C | -0.02 (-0.13, 0.08) | 0.655 |  | -0.11 (-0.31, 0.09) | 0.261 |
| ALT | 0.02 (-0.19, 0.24) | 0.849 |  | 0.23 (-0.13, 0.60) | 0.209 |
| AST | 0.16 (0.04, 0.29) | 0.012 |  | 0.21 (-0.01, 0.43) | 0.056 |
| ALP | -0.05 (-0.17, 0.08) | 0.476 |  | -0.01 (-0.26, 0.23) | 0.917 |
| GGT | -0.15 (-0.43, 0.12) | 0.276 |  | 0.01 (-0.48, 0.50) | 0.964 |
| SUA | -0.11 (-0.21, -0.01) | 0.027 |  | 0.02 (-0.17, 0.21) | 0.845 |
| sCr | -0.06 (-0.15, 0.03) | 0.219 |  | 0.03 (-0.13, 0.19) | 0.705 |
| Urea | -0.02 (-0.14, 0.09) | 0.688 |  | 0.13 (-0.06, 0.33) | 0.188 |
| **Notes**: The chronotype score and metabolic parameters concentration were natural-log (ln) transformed. All linear regression adjusted for age, sex, body mass index, smoking status, drinking status, and physical activity.  **Abbreviations**: β, β-coefficient; CI, confidence interval; FBG, fasting blood glucose; TG, triglyceride; TC, total cholesterol; LDL-C, low-density lipoprotein-cholesterol; HDL-C, high-density lipoprotein-cholesterol; ALT, alanine transaminase; AST, aspartate aminotransferase; ALP, alkaline phosphatase; GGT, γ-glutamyltransferase; SUA, serum uric acid; sCr, creatinine. | | | | | |

| **Supplementary Table S2** The estimate for association between chronotype and serum metabolic parameters stratified by sex | | | | | |
| --- | --- | --- | --- | --- | --- |
| Metabolic parameters | Men (n = 514) | |  | Women (n = 431) | |
| β (95% CI) | *P*-value |  | β (95% CI) | *P*-value |
| FBG | -0.01 (-0.09, 0.09) | 0.980 |  | -0.02 (-0.08, 0.05) | 0.651 |
| TG | -0.12 (-0.46, 0.22) | 0.485 |  | -0.08 (-0.36, 0.19) | 0.552 |
| TC | -0.12 (-0.23, -0.02) | 0.024 |  | -0.10 (-0.21, 0.01) | 0.066 |
| LDL-C | -0.24 (-0.41, -0.07) | 0.007 |  | -0.16 (-0.34, 0.02) | 0.086 |
| HDL-C | -0.04 (-0.17, 0.09) | 0.523 |  | -0.06 (-0.19, 0.08) | 0.413 |
| ALT | -0.04 (-0.30, 0.23) | 0.786 |  | 0.16 (-0.09, 0.41) | 0.200 |
| AST | 0.16 (-0.01, 0.32) | 0.052 |  | 0.17 (0.02, 0.31) | 0.022 |
| ALP | -0.12 (-0.27, 0.03) | 0.115 |  | 0.10 (-0.06, 0.27) | 0.213 |
| GGT | -0.37 (-0.72, -0.03) | 0.036 |  | 0.12 (-0.20, 0.44) | 0.461 |
| SUA | -0.06 (-0.19, 0.07) | 0.360 |  | -0.11 (-0.23, 0.01) | 0.081 |
| sCr | 0.01 (-0.13, 0.13) | 0.990 |  | -0.07 (-0.16, 0.02) | 0.143 |
| Urea | 0.07 (-0.07, 0.21) | 0.341 |  | -0.02 (-0.16, 0.12) | 0.815 |
| **Notes**: The chronotype score and metabolic parameters concentration were natural-log (ln) transformed. All linear regression adjusted for age, body mass index, smoking status, drinking status, and physical activity.  **Abbreviations**: β, β-coefficient; CI, confidence interval; FBG, fasting blood glucose; TG, triglyceride; TC, total cholesterol; LDL-C, low-density lipoprotein-cholesterol; HDL-C, high-density lipoprotein-cholesterol; ALT, alanine transaminase; AST, aspartate aminotransferase; ALP, alkaline phosphatase; GGT, γ-glutamyltransferase; SUA, serum uric acid; sCr, creatinine. | | | | | |

| **Supplementary Table S3** The estimate for association between chronotype and serum metabolic parameters stratified by BMI | | | | | |
| --- | --- | --- | --- | --- | --- |
| Metabolic parameters | BMI at or below median (≤ 24.4 kg/m2)  (n = 471) | |  | BMI above median (> 24.4 kg/m2)  (n = 474) | |
| β (95% CI) | *P*-value |  | β (95% CI) | *P*-value |
| FBG | 0.01 (-0.07, 0.09) | 0.794 |  | -0.03 (-0.12, 0.06) | 0.490 |
| TG | -0.24 (-0.53, 0.05) | 0.108 |  | 0.06 (-0.28, 0.40) | 0.718 |
| TC | -0.16 (-0.27, -0.06) | 0.002 |  | -0.05 (-0.16, 0.06) | 0.375 |
| LDL-C | -0.24 (-0.41, -0.08) | 0.004 |  | -0.15 (-0.34, 0.04) | 0.114 |
| HDL-C | -0.05 (-0.18, 0.09) | 0.517 |  | -0.05 (-0.18, 0.08) | 0.436 |
| ALT | 0.17 (-0.10, 0.43) | 0.212 |  | 0.01 (-0.26, 0.26) | 0.974 |
| AST | 0.19 (0.04, 0.35) | 0.013 |  | 0.14 (-0.01, 0.30) | 0.070 |
| ALP | 0.07 (-0.09, 0.23) | 0.408 |  | -0.11 (-0.27, 0.05) | 0.172 |
| GGT | 0.25 (-0.08, 0.58) | 0.140 |  | -0.44 (-0.80, -0.10) | 0.012 |
| SUA | -0.05 (-0.17, 0.08) | 0.455 |  | -0.10 (-0.23, 0.02) | 0.102 |
| sCr | -0.05 (-0.17, 0.07) | 0.397 |  | -0.04 (-0.14, 0.07) | 0.512 |
| Urea | -0.01 (-0.15, 0.14) | 0.934 |  | 0.04 (-0.10, 0.18) | 0.565 |
| **Notes**: The chronotype score and metabolic parameters concentration were natural-log (ln) transformed. All linear regression adjusted for age, sex, body mass index, smoking status, drinking status, and physical activity.  **Abbreviations**: BMI, body mass index; β, β-coefficient; CI, confidence interval; FBG, fasting blood glucose; TG, triglyceride; TC, total cholesterol; LDL-C, low-density lipoprotein-cholesterol; HDL-C, high-density lipoprotein-cholesterol; ALT, alanine transaminase; AST, aspartate aminotransferase; ALP, alkaline phosphatase; GGT, γ-glutamyltransferase; SUA, serum uric acid; sCr, creatinine. | | | | | |
